# Supplementary material for: Redefining Hypoglycemia in Clinical Trials: Validation of Definitions Recently Adopted by the American Diabetes Association/European Association for the Study of Diabetes
Source: Oxford University Press journal article supplement (doi:10.2337/dc18-2361), 2019-10-28
Supplement: dc182361supplementarydata.pdf [file dc182361supplementarydata.pdf]

SUPPLEMENTARY DATA

**Redefining hypoglycemia in clinical trials: validation of definitions recently adopted by American Diabetes Association/European Association for the Study of Diabetes**

**Supplementary appendix:**

**Contents**

|                                                                                                                                                                                                                                    |   |
|------------------------------------------------------------------------------------------------------------------------------------------------------------------------------------------------------------------------------------|---|
| <a href="#">Table S1: SWITCH and DEVOTE trial summary</a> .....                                                                                                                                                                    | 2 |
| <a href="#">Table S2: Hypoglycemia definitions applied to the SWITCH and DEVOTE trial data</a> .....                                                                                                                               | 4 |
| <a href="#">Figure S1: Non-severe hypoglycemic events (total and symptomatic) in the total treatment period of SWITCH 2 and 1 at different plasma glucose levels in a pooled randomized treatment dataset</a> 5                    |   |
| <a href="#">Figure S2: Estimated rate ratios of non-severe hypoglycemic events (total and symptomatic; degludec versus glargine U100) in the total treatment period of SWITCH 2 and 1 at different plasma glucose levels</a> ..... | 6 |
| <a href="#">Figure S3: Hypoglycemic events in SWITCH 1 by treatment group</a> .....                                                                                                                                                | 7 |
| <a href="#">References</a> .....                                                                                                                                                                                                   | 8 |

SUPPLEMENTARY DATA

**Supplementary Table S1: SWITCH and DEVOTE trial summary**

|                           | <b>SWITCH 1 and 2</b>                                                                                                                                                                                                                                                                                                                                                                                                                                                                                                                                                                                                                                                                                                                                                                                                                                        | <b>DEVOTE</b>                                                                                                                                                                                                                                                                                                                                                                                                                                                                                        |
|---------------------------|--------------------------------------------------------------------------------------------------------------------------------------------------------------------------------------------------------------------------------------------------------------------------------------------------------------------------------------------------------------------------------------------------------------------------------------------------------------------------------------------------------------------------------------------------------------------------------------------------------------------------------------------------------------------------------------------------------------------------------------------------------------------------------------------------------------------------------------------------------------|------------------------------------------------------------------------------------------------------------------------------------------------------------------------------------------------------------------------------------------------------------------------------------------------------------------------------------------------------------------------------------------------------------------------------------------------------------------------------------------------------|
| <b>Trial design</b>       | Double-blind, randomized, two-period crossover, multicenter, treat-to-target clinical trials                                                                                                                                                                                                                                                                                                                                                                                                                                                                                                                                                                                                                                                                                                                                                                 | Double-blind, randomized, active comparator, treat-to-target cardiovascular outcomes trial                                                                                                                                                                                                                                                                                                                                                                                                           |
| <b>Trial duration</b>     | Time dependent: 64-weeks <ul style="list-style-type: none"> <li>Two treatment periods (32 weeks each) each consisting of a 16-week titration period (Weeks 1–16 and Weeks 33–48) and a 16-week maintenance period (Weeks 17–32 and Weeks 49–64)</li> </ul>                                                                                                                                                                                                                                                                                                                                                                                                                                                                                                                                                                                                   | Event driven: Continue until at least 633 MACE had accrued                                                                                                                                                                                                                                                                                                                                                                                                                                           |
| <b>Comparators</b>        | Degludec versus glargine U100                                                                                                                                                                                                                                                                                                                                                                                                                                                                                                                                                                                                                                                                                                                                                                                                                                | Degludec versus glargine U100                                                                                                                                                                                                                                                                                                                                                                                                                                                                        |
| <b>Inclusion criteria</b> | <p><b>SWITCH 1:</b></p> <ul style="list-style-type: none"> <li>Type 1 diabetes</li> <li>HbA<sub>1c</sub> levels of ≤10%</li> <li>BMI ≤45 kg/m<sup>2</sup></li> <li>Basal–bolus regimen or continuous subcutaneous insulin infusion for ≥26 weeks</li> </ul> <p><b>SWITCH 2:</b></p> <ul style="list-style-type: none"> <li>Insulin-experienced patients with type 2 diabetes</li> <li>HbA<sub>1c</sub> levels of ≤9.5%</li> <li>BMI ≤45 kg/m<sup>2</sup></li> <li>Any basal insulin with or without OADs (any combination of metformin, dipeptidyl peptidase-4 inhibitor, α-glucosidase inhibitor, thiazolidinediones, and sodium glucose cotransporter-2 inhibitor)</li> </ul> <p><b>SWITCH 1 and 2:</b><br/>At least 1 of the following risk factors for hypoglycemia:</p> <ul style="list-style-type: none"> <li>≥1 severe hypoglycemic events</li> </ul> | <ul style="list-style-type: none"> <li>Type 2 diabetes</li> <li>Treated with ≥1 oral or injectable antihyperglycemic agent</li> <li>HbA<sub>1c</sub> ≥7.0%, or with ≥20 units/day of basal insulin</li> <li>≥1 co-existing cardiovascular or renal condition and were aged ≥50 years</li> <li>OR ≥1 of a list of pre-specified cardiovascular risk factors and were aged ≥60 years</li> <li>Patients were not excluded if they had experienced severe hypoglycemia prior to randomization</li> </ul> |

SUPPLEMENTARY DATA

|                   |                                                                                                                                                                                                                                                                                                           |       |
|-------------------|-----------------------------------------------------------------------------------------------------------------------------------------------------------------------------------------------------------------------------------------------------------------------------------------------------------|-------|
|                   | <p>within the last year</p> <ul style="list-style-type: none"> <li>• Moderate chronic renal failure</li> <li>• Hypoglycemia symptom unawareness</li> <li>• Diabetes duration &gt;15 years (SWITCH 1)/Insulin use &gt;5 years (SWITCH 2)</li> <li>• Hypoglycemic event within the last 12 weeks</li> </ul> |       |
| <b>References</b> | (1,2)                                                                                                                                                                                                                                                                                                     | (3,4) |

BMI, body mass index; MACE, major adverse cardiovascular event; OAD, oral antidiabetes drug.

SUPPLEMENTARY DATA

**Supplementary Table S2: Hypoglycemia definitions applied to the SWITCH and DEVOTE trial data**

| Hypoglycemia definitions applied in this secondary analysis |                                                                                                                            | SWITCH           | DEVOTE           | References |
|-------------------------------------------------------------|----------------------------------------------------------------------------------------------------------------------------|------------------|------------------|------------|
| <b>ADA 2005</b>                                             | Events confirmed by a PG of $\leq 3.9$ mmol/L with symptoms                                                                | ✓                |                  | 5          |
| <b>Level 2</b>                                              | Events confirmed by a glucose of $< 3.0$ mmol/L                                                                            | ✓                |                  | 6          |
| <b>Level 3</b>                                              | Events requiring third-party assistance (ADA)                                                                              | ✓ <sup>a,b</sup> | ✓ <sup>a,b</sup> | 6,7        |
| <b>Novo Nordisk</b>                                         | Events confirmed by a PG of $< 3.1$ mmol/L with symptoms or events that are severe, requiring third-party assistance (ADA) | ✓ <sup>b</sup>   |                  | 1,2        |

ADA, American Diabetes Association; PG, plasma glucose.

<sup>a</sup>Adjudicated by a central, blinded, independent Event Adjudication Committee.

<sup>b</sup>Pre-specified definition.

SUPPLEMENTARY DATA

**Supplementary Figure S1: Non-severe hypoglycemic events (total and symptomatic) in the total treatment period of SWITCH 2 and 1 at different plasma glucose levels in a pooled randomized treatment dataset**

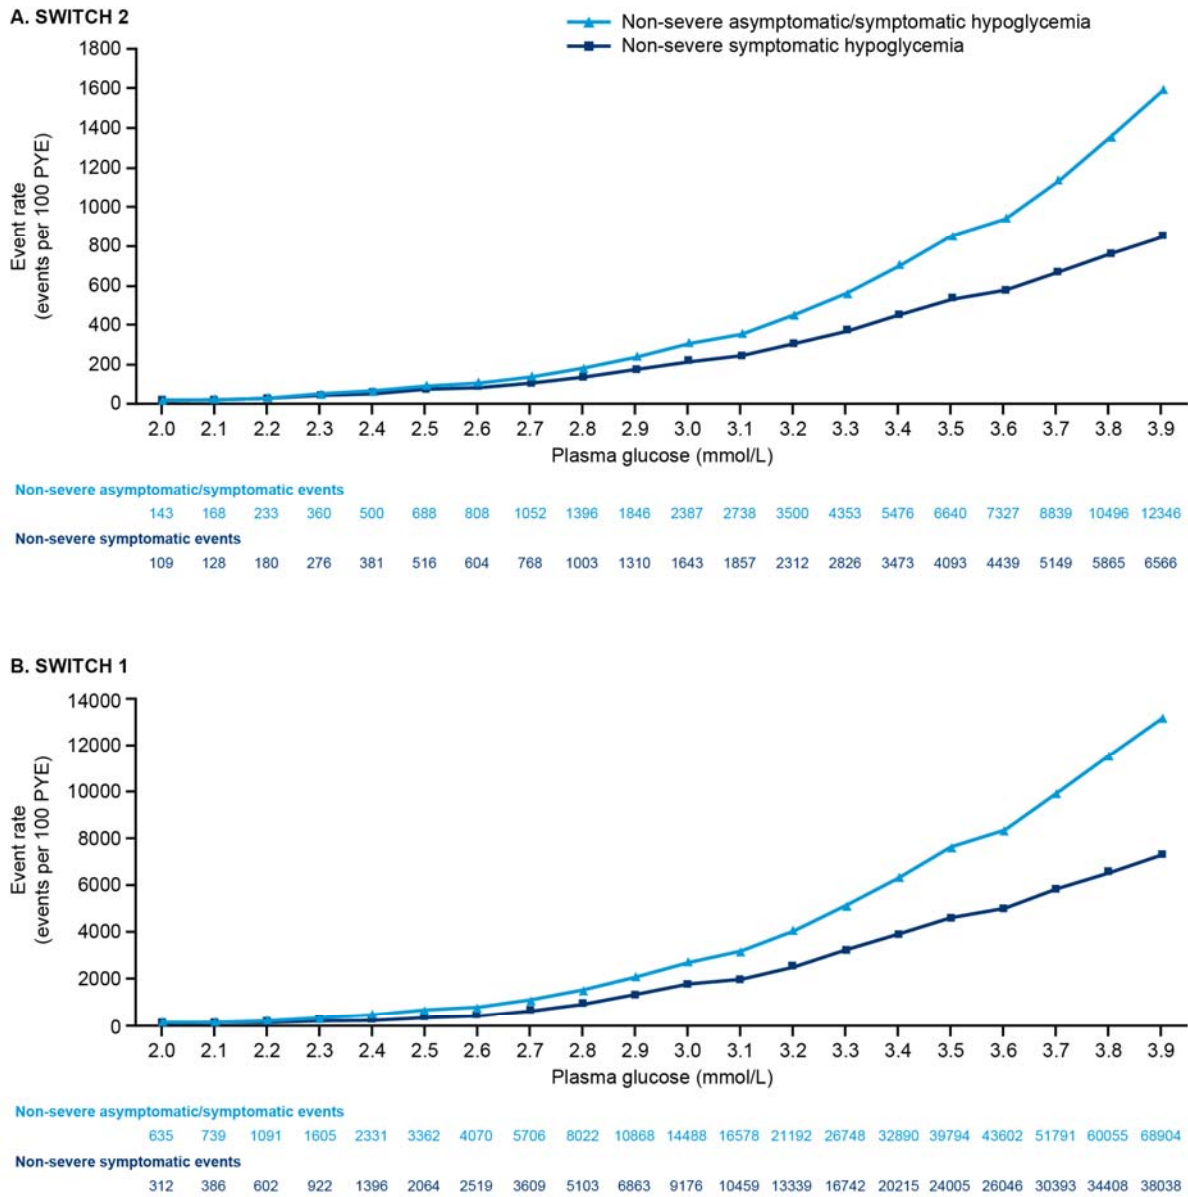

The event rates in the pooled randomized treatment dataset (degludec and glargine U100) are plotted at a given plasma glucose level or lower. PYE, patient year of exposure.

SUPPLEMENTARY DATA

**Supplementary Figure S2: Estimated rate ratios of non-severe hypoglycemic events (total and symptomatic; degludec versus glargine U100) in the total treatment period of SWITCH 2 and 1 at different plasma glucose levels**

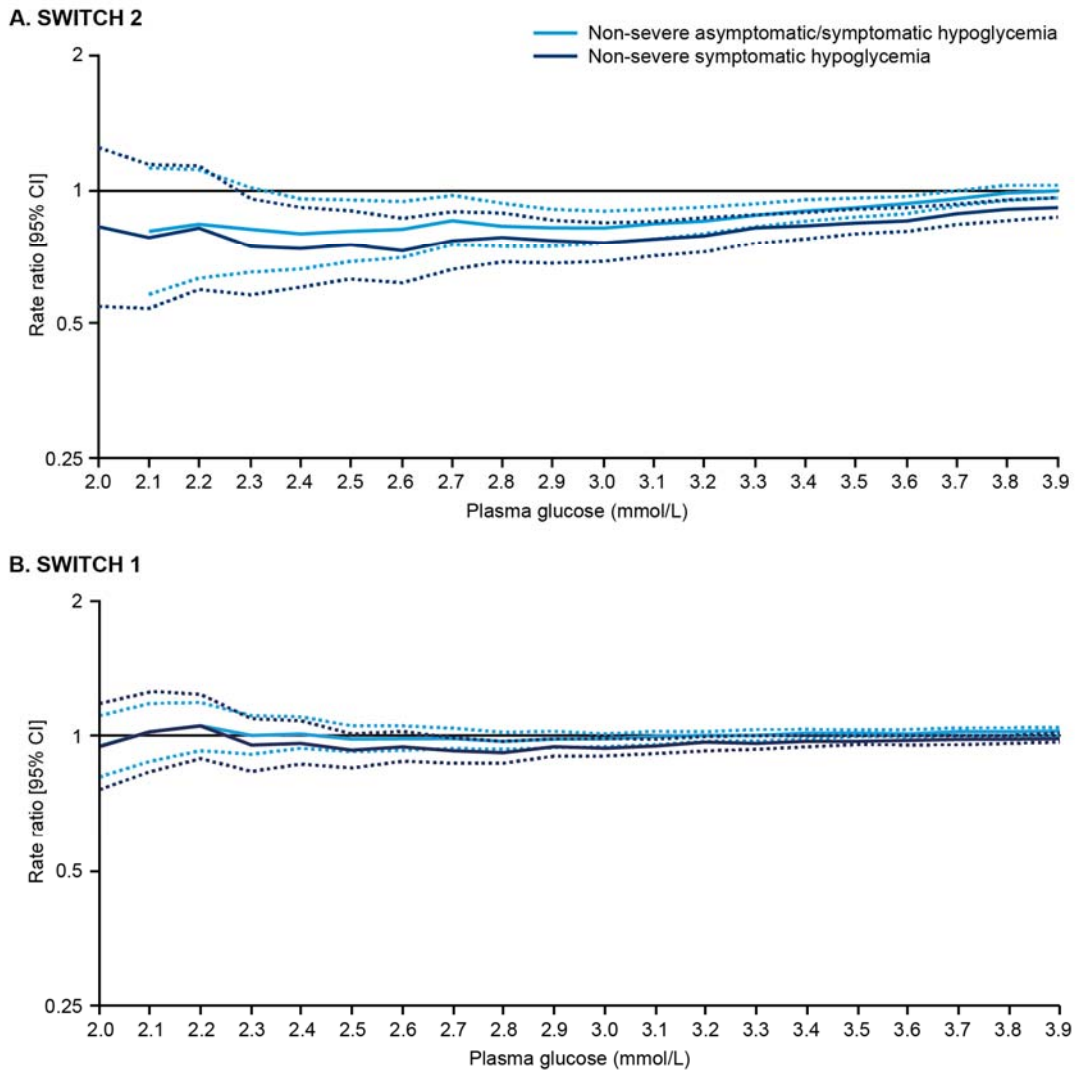

The solid lines represent the estimated rate ratio (degludec versus glargine U100) at different plasma glucose levels. The dashed lines represent the upper and lower 95% confidence intervals. Glargine U100, insulin glargine 100 units/mL.

SUPPLEMENTARY DATA

**Supplementary Figure S3: Hypoglycemic events in SWITCH 1 by treatment group**

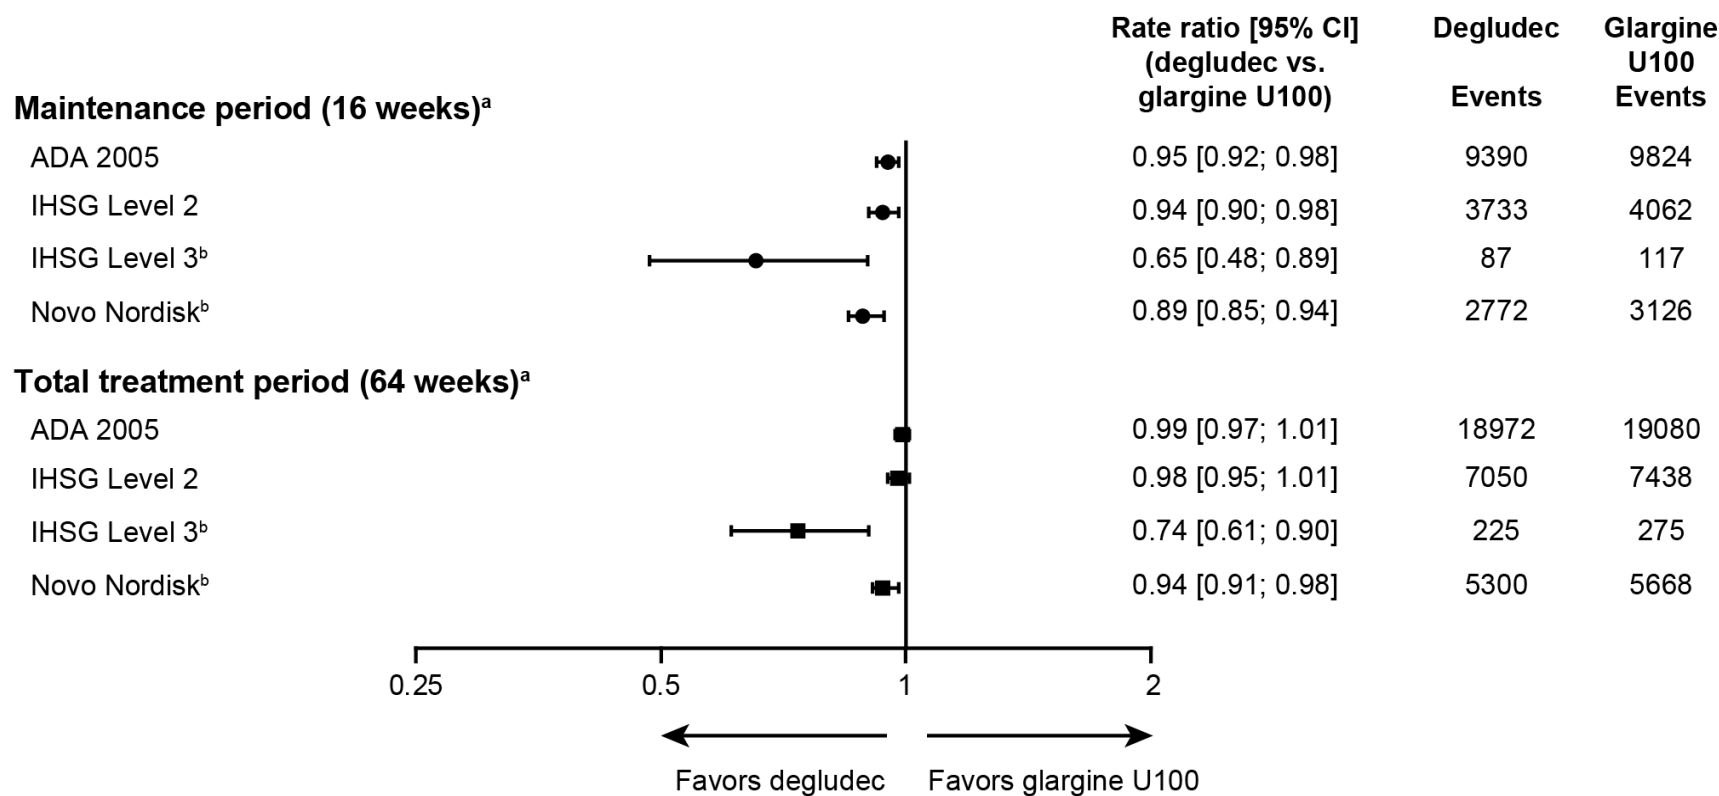

<sup>a</sup>The total trial duration was 64 weeks; this included 32 weeks' treatment with once-daily degludec or glargine U100 followed by crossover to glargine U100 or degludec, respectively, for a further 32 weeks. Each 32-week treatment period consisted of a 16-week titration period and a 16-week maintenance period.

<sup>b</sup>Pre-specified hypoglycemia definition as used during the original trial.

ADA 2005: plasma glucose  $\leq 3.9$  mmol/L with symptoms; IHSG Level 2: glucose  $< 3.0$  mmol/L; IHSG Level 3: severe events requiring third-party assistance intervention independent of a defined glucose; Novo Nordisk: plasma glucose  $< 3.1$  mmol/L with symptoms plus severe events.

Glargine U100, insulin glargine 100 units/mL.

## SUPPLEMENTARY DATA

### References

1. Lane W, Bailey TS, Gerety G, *et al.* Effect of insulin degludec vs insulin glargine U100 on hypoglycemia in patients with type 1 diabetes: the SWITCH 1 randomized clinical trial. *JAMA* 2017;318:33–44.
2. Wysham C, Bhargava A, Chaykin L, *et al.* Effect of Insulin degludec vs insulin glargine U100 on hypoglycemia in patients with type 2 diabetes: the SWITCH 2 randomized clinical trial. *JAMA* 2017;318:45–56.
3. Marso SP, McGuire DK, Zinman B, *et al.* Design of DEVOTE (Trial Comparing Cardiovascular Safety of Insulin Degludec vs Insulin Glargine in Patients With Type 2 Diabetes at High Risk of Cardiovascular Events) – DEVOTE 1. *Am Heart J* 2016;179:175–183
4. Marso SP, McGuire DK, Zinman B, *et al.* Efficacy and safety of degludec versus glargine in type 2 diabetes. *N Engl J Med* 2017;377:723–732.
5. American Diabetes Association Workgroup on Hypoglycemia. *Diabetes Care* 2005;28:1245–1249.
6. International Hypoglycaemia Study Group. Glucose concentrations of less than 3.0 mmol/l (54 mg/dl) should be reported in clinical trials: a joint position statement of the American Diabetes Association and the European Association for the Study of Diabetes. *Diabetes Care* 2017;40:155–157.
7. Seaquist ER, Anderson J, Childs B, *et al.* Hypoglycemia and diabetes: a report of a workgroup of the American Diabetes Association and the Endocrine Society. *Diabetes Care* 2013;36:1384–1395.
